# Supplementary material for: Accuracy of high-frequency musculoskeletal ultrasound in hand trauma: a retrospective surgical field-based validation study at a single center
Source: PeerJ. 2025 Dec 15;13:e20514. doi: 10.7717/peerj.20514 (PMC12713555; doi:10.7717/peerj.20514)
Supplement: Supplemental Information 1 [file peerj-13-20514-s001.xlsx]

## Sheet: Summary table
No.	gender	age	left/right	Ultrasound report content	Passive motion	Horizontal position
1	male	69	left	flexor pollicis longus tendon rupture	non-existent	hand and wrist
2	female	54	right	extensor pollicis longus rupture/swelling of the broken end	non-existent	hand and wrist
3	male	54	right	extensor pollicis longus rupture/	non-existent	crossing the second chamber
4	female	40	right	superficial flexor of the middle finger rupture/rupture end 3.7mm		middle finger
5	female	48	right	extensor tendon of index and middle finger tear /rupture end 17mm/haematoma	non-existent	middle finger
6	female	41	right	flexor pollicis longus tendon rupture/rupture end 1.2mm	non-existent、contracture	metacarpophalangeal joint
7	male	25	right	extensor tendon of index finger tear/ length 5mm, thickness 2mm		distal interphalangeal joint
8	male	19	right	extensor tendon of little finger rupture	non-existent	distal phalanx attachment site
9	female	42	right	extensor tendon of ring finger rupture	non-existent	distal phalanx attachment site
10	female	53	right	extensor tendon of little finger central fascicle rupture	non-existent	middle finger
11	male	36	right	extensor tendon of middle finger swollen/ terminally free/cartilage distended/ruptured		distal phalanx attachment site
12	male	25	right	deep flexor of the ring finger rupture/rupture end 30mm/ effusion/intact superficial flexor of the finger	non-existent	too long/unspecified
13	male	22	left	extensor tendon of little finger rupture/rupture end contracture		distal phalanx attachment site
14	male	41	left	central fascicle of extensor tendon of middle finger swollen/ increased blood flow/effusion	existence	proximal interphalangeal joint
15	male	23	right	extensor tendon of little finger rupture/ rupture end contracture/rupture end 12mm	non-existent、contracture	proximal interphalangeal joint
16	male	27	right	extensor tendon of thumb rupture/contracture		bottom of distal phalanx
17	male	57	right	ring finger extensor tendon thinning/possible injury/effusion	existence	middle finger
18	male	57	right	poor continuity of extensor tendon of thumb/ length 3.1mm, thickness 0.9mm/tear	slight existence	proximal phalanx
19	female	69	left	swelling of the flexor pollicis longus muscle/ uneven echo/effusion/discontinuity/tear	poor	interphalangeal joint
20	female	47	left	extensor tendon of little finger rupture		bottom of distal phalanx
21	female	42	right	swelling of extensor tendon of little finger/ discontinuity of bone fragments/rough cortex (avulsion fracture)		bottom of distal phalanx
22	male	27	right	swelling of extensor tendon of little finger / avulsion of bone fragment, 1.8mm (avulsion fracture)		bottom of distal phalanx
23	female	52	right	extensor tendon of the index finger rupture/rupture end 2.9mm		proximal interphalangeal joint
24	male	22	right	swelling of extensor tendon of little finger / avulsion of bone fragment, 2.3mm (avulsion fracture)		bottom of distal phalanx
25	female	8	left	deep flexor tendon of index finger rupture/rupture end 10mm/effusion		distal phalanx
26	male	20	right	extensor tendon of the index finger entral fascicle swelling/possible injury/effusion	existence	proximal interphalangeal joint
27	male	25	right	flexor pollicis longus tendon rupture/rupture end 19mm/effusion	non-existent	wrist joint
28	male	33	left	deep flexor tendon of ring finger rupture/ rupture end 20mm/superficial tendon normal	disappearance	middle finger
29	male	31	left	extensor tendon of little finger rupture		distal phalanx
30	female	57	left	deep tendon of the middle finger rupture/rupture end 22.7mm	disappearance	proximal interphalangeal joint
31	female	42	left	extensor tendon of the index finger rupture /unevenness at the interphalangeal nerve incision/injury	disappearance	palm level
32	male	14	left	circumferential finger deep flexor incision not incised at mid-portion of incision/ rupture end 21mm，superficial flexor of the finger not homogeneous	non-existent	incision site
33	male	44	left	radial carpal flexor rupture/rupture end 12mm /median nerve rupture/rupture end 14mm	fracture contracture	wrist joint
34	male	27	left	extensor tendon of little finger rupture	disappearance	distal phalanx attachment site
35	male	14	right	lateral bundle of extensor tendon of the index finger swollen	non-existent	distal phalanx attachment site
36	male	69	left	extensor tendon of the index finger rupture		metacarpal bone
37	male	19	right	third and fourth extensor tendon rupture/effusion		body surface
38	male	51	right	extensor tendon of the middle finger rupture/rupture end 18mm		metacarpophalangeal joint
39	male	24	right	extensor tendon of middle finger with avulsion of bone fragments, 1.8 mm long (avulsion fracture) / effusion		distal phalanx attachment site
40	male	36	left	extensor pollicis longus rupture	disappearance	interphalangeal joint
41	male	40	left	extensor pollicis longus rupture/rupture end 8.9mm	disappearance	metacarpophalangeal joint
42	female	49	left	flexor pollicis longus tendon rupture		incision site/wrist joint
43	male	26	right	extensor pollicis longus rupture/rupture end 14.2		wrist joint
44	male	27	left	deep flexor of ring finger rupture/rupture end 27mm	non-existent	proximal interphalangeal joint
45	male	16	left	finger flexor pollicis longus tendus rupture/ few fibres seen in superficial flexor of little finger	non-existent	metacarpophalangeal joint
46	female	43	right	flexor pollicis longus tendon rupture/rupture end 24.5mm	non-existent	metacarpophalangeal joint
47	male	49	right	deep flexor tendon of index finger rupture/rupture end 29mm	non-existent	metacarpophalangeal joint

## Sheet: Flexor tendon injury
No.	gender	age	left/right	Ultrasound report content	Passive motion	Surgeries	Horizontal position
1	male	69	left	flexor pollicis longus tendon rupture	non-existent	flexor tendon rupture	hand and wrist
2	female	40	right	superficial flexor of the middle finger rupture/ rupture end 3.7mm		flexor tendon rupture	middle finger
3	female	41	right	flexor pollicis longus tendon rupture/rupture end 1.2mm	non-existent、contracture	flexor tendon rupture	metacarpophalangeal joint
4	male	25	right	deep flexor of the ring finger rupture/rupture end 30mm/ effusion/intact superficial flexor of the finger	non-existent	flexor tendon rupture	too long/unspecified
5	female	69	left	swelling of the flexor pollicis longus muscle/ uneven echo/effusion/discontinuity/tear	poor	flexor tendon rupture	interphalangeal joint
6	female	8	left	deep flexor tendon of index finger rupture/rupture end 10mm/effusion		flexor tendon rupture	distal phalanx
7	male	25	right	flexor pollicis longus tendon rupture/rupture end 19mm/effusion	non-existent	flexor tendon rupture	wrist joint
8	male	33	left	deep flexor tendon of ring finger rupture/ rupture end 20mm/superficial tendon normal	disappearance	combined nerve	middle finger
9	female	57	left	deep tendon of the middle finger rupture/rupture end 22.7mm	disappearance	flexor tendon rupture	proximal interphalangeal joint
10	male	14	left	circumferential finger deep flexor incision not incised at mid-portion of incision/ rupture end 21mm，superficial flexor of the finger not homogeneous	non-existent	flexor tendon rupture	incision site
11	male	44	left	radial carpal flexor rupture/rupture end 12mm /median nerve rupture/rupture end 14mm	fracture contracture	correct	wrist joint
12	female	49	left	flexor pollicis longus tendon rupture		flexor tendon rupture	incision site/wrist joint
13	male	27	left	deep flexor of ring finger rupture/rupture end 27mm	non-existent	flexor tendon rupture	proximal interphalangeal joint
14	male	16	left	finger flexor pollicis longus tendus rupture/ few fibres seen in superficial flexor of little finger	non-existent		metacarpophalangeal joint
15	female	43	right	flexor pollicis longus tendon rupture/rupture end 24.5mm	non-existent	flexor tendon rupture	metacarpophalangeal joint
16	male	49	right	deep flexor tendon of index finger rupture/rupture end 29mm	non-existent	flexor tendon rupture	metacarpophalangeal joint

## Sheet: Extensor tendon injury
No.	gender	age	left/right	Ultrasound report content	Passive motion	Surgeries	Horizontal position
1	female	54	right	extensor pollicis longus rupture/swelling of the broken end	non-existent		hand and wrist
2	male	54	right	extensor pollicis longus rupture	non-existent		crossing the second chamber
3	female	48	right	extensor tendon of index and middle finger tear /rupture end 17mm/haematoma	non-existent		middle finger
4	male	25	right	extensor tendon of index finger tear/ length 5mm, thickness 2mm		tear	distal interphalangeal joint
5	male	19	right	extensor tendon of little finger rupture	non-existent		distal phalanx attachment site
6	female	42	right	extensor tendon of ring finger rupture	non-existent	tear	distal phalanx attachment site
7	female	53	right	extensor tendon of little finger central fascicle rupture	non-existent		middle finger
8	male	36	right	extensor tendon of middle finger swollen/ terminally free/cartilage distended/ruptured		combined nerve	distal phalanx attachment site
9	male	22	left	extensor tendon of little finger rupture/rupture end contracture			distal phalanx attachment site
10	male	41	left	central fascicle of extensor tendon of middle finger swollen/ increased blood flow/effusion	existence	tear	proximal interphalangeal joint
11	male	23	right	extensor tendon of little finger rupture/rupture end contracture/rupture end 12mm	non-existent、contracture		proximal interphalangeal joint
12	male	27	right	extensor tendon of thumb rupture/contracture			bottom of distal phalanx
13	male	57	right	ring finger extensor tendon thinning/possible injury/effusion	existence	tear	middle finger
14	male	57	right	poor continuity of extensor tendon of thumb/ length 3.1mm, thickness 0.9mm/tear	slight existence	tear	proximal phalanx
15	female	47	left	extensor tendon of little finger rupture			bottom of distal phalanx
16	female	52	right	extensor tendon of the index finger rupture/rupture end 2.9mm			proximal interphalangeal joint
17	male	20	right	extensor tendon of the index finger entral fascicle swelling/ possible injury/effusion	existence	combined nerve	proximal interphalangeal joint
18	male	31	left	extensor tendon of little finger rupture			distal phalanx
19	female	42	left	extensor tendon of the index finger rupture /unevenness at the interphalangeal nerve incision/injury	disappearance	correct	palm level
20	male	27	left	extensor tendon of little finger rupture	disappearance		distal phalanx attachment site
21	male	14	right	lateral bundle of extensor tendon of the index finger swollen	non-existent	tear	distal phalanx attachment site
22	male	69	left	extensor tendon of the index finger rupture			metacarpal bone
23	male	19	right	third and fourth extensor tendon rupture/effusion			body surface
24	male	51	right	extensor tendon of the middle finger rupture/ rupture end 18mm			metacarpophalangeal joint
25	male	36	left	extensor pollicis longus rupture	disappearance		interphalangeal joint
26	male	40	left	extensor pollicis longus rupture/rupture end 8.9mm	disappearance		metacarpophalangeal joint
27	male	26	right	extensor pollicis longus rupture/rupture end 14.2mm			wrist joint

## Sheet: Other injury
No.	gender	age	left/right	Ultrasound report content	Passive motion	Horizontal position
21	female	42	right	swelling of extensor tendon of little finger/ discontinuity of bone fragments/rough cortex (avulsion fracture)		bottom of distal phalanx
22	male	27	right	swelling of extensor tendon of little finger / avulsion of bone fragment, 1.8mm (avulsion fracture)		bottom of distal phalanx
24	male	22	right	swelling of extensor tendon of little finger / avulsion of bone fragment, 2.3mm (avulsion fracture)		bottom of distal phalanx
39	male	24	right	extensor tendon of middle finger with avulsion of bone fragments, 1.8 mm long (avulsion fracture) / effusion		distal phalanx attachment site
